# Supplementary material
Source: publisher figshare collection journal article supplement (https://gsajournals.figshare.com/ndownloader/files/14393732)
Supplement: Supplementary file 1 [file 14393732]

## Sheet: Sheet1
Category	Inheritance	Reference	Number	AnnotatedGenes	Total	Proportion	pval	Significance
Heterodimer	Tetrasomic	Mouse	60	4336	302	0.0138376	0.0320028	Significant
Heteromultimer	Tetrasomic	Mouse	12	4336	302	0.00276753	0.694448	NotSignificant
Homomultimers	Tetrasomic	Mouse	117	4336	302	0.0269834	0.83591	NotSignificant
Monomers	Tetrasomic	Mouse	34	4336	302	0.00784133	0.0191017	Significant
Undefined	Tetrasomic	Mouse	79	4336	302	0.0182196	0.265561	NotSignificant
Heterodimer	Tetrasomic	Danio	23	4336	115	0.00530443	0.173394	NotSignificant
Heteromultimer	Tetrasomic	Danio	2	4336	115	0.000461255	0.221123	NotSignificant
Homomultimers	Tetrasomic	Danio	67	4336	115	0.015452	0.0510507	NotSignificant
Monomers	Tetrasomic	Danio	8	4336	115	0.00184502	0.385613	NotSignificant
Undefined	Tetrasomic	Danio	15	4336	115	0.00345941	0.271966	NotSignificant
Heterodimer	Tetrasomic	Salmo	0	4336	11	0	NA	NA
Heteromultimer	Tetrasomic	Salmo	2	4336	11	0.000461255	0.13909	NotSignificant
Homomultimers	Tetrasomic	Salmo	3	4336	11	0.000691882	0.273885	NotSignificant
Monomers	Tetrasomic	Salmo	2	4336	11	0.000461255	0.986734	NotSignificant
Undefined	Tetrasomic	Salmo	4	4336	11	0.000922509	0.623322	NotSignificant
Heterodimer	Disomic	Mouse	108	11135	678	0.00969915	0.0320028	Significant
Heteromultimer	Disomic	Mouse	37	11135	678	0.00332286	0.694448	NotSignificant
Homomultimers	Disomic	Mouse	309	11135	678	0.0277503	0.83591	NotSignificant
Monomers	Disomic	Mouse	51	11135	678	0.00458015	0.0191017	Significant
Undefined	Disomic	Mouse	173	11135	678	0.0155366	0.265561	NotSignificant
Heterodimer	Disomic	Danio	40	11135	268	0.00359228	0.173394	NotSignificant
Heteromultimer	Disomic	Danio	15	11135	268	0.0013471	0.221123	NotSignificant
Homomultimers	Disomic	Danio	127	11135	268	0.0114055	0.0510507	NotSignificant
Monomers	Disomic	Danio	31	11135	268	0.00278401	0.385613	NotSignificant
Undefined	Disomic	Danio	55	11135	268	0.00493938	0.271966	NotSignificant
Heterodimer	Disomic	Salmo	0	11135	15	0	NA	NA
Heteromultimer	Disomic	Salmo	0	11135	15	0	0.13909	NotSignificant
Homomultimers	Disomic	Salmo	2	11135	15	0.000179614	0.273885	NotSignificant
Monomers	Disomic	Salmo	7	11135	15	0.000628648	0.986734	NotSignificant
Undefined	Disomic	Salmo	6	11135	15	0.000538841	0.623322	NotSignificant
